# Supplementary material
Source: Research Square preprint supplement (doi:10.21203/rs.3.rs-10007745/v1)
Supplement: Supplementary file 1 [file ac5dcce6ae11590f720902f2.docx]

**Supplementary Table1** Crude Mortality Rate per 100,100 adults of Bronchus and Lung Cancer in the United States stratified by age groups, 1999 to 2024

| **Year** | **Crude Mortality Rate per 100,100 adults** | | | | | | |
| --- | --- | --- | --- | --- | --- | --- | --- |
|  | 25-34 | 35-44 | 45-54 | 55-64 | 65-74 | 75-84 | 85+ |
| 1999 | 0.44 (0.38 – 0.51) | 6.04 (5.81 – 6.27) | 31.24 (30.67 – 31.82) | 123.33 (121.92 – 124.74) | 281.29 (278.87 – 283.71) | 361.89 (358.52 – 365.26) | 296.85 (291.61 – 302.08) |
| 2000 | 0.49 (0.42 – 0.56) | 6.10 (5.87 – 6.32) | 31.59 (31.03 – 32.16) | 122.39 (121.00 – 123.78) | 283.98 (281.55 – 286.42) | 370.59 (367.19 – 373.98) | 301.94 (296.71 – 307.17) |
| 2001 | 0.40 (0.34 – 0.46) | 6.20 (5.97 – 6.43) | 30.55 (30.00 – 31.09) | 118.54 (117.19 – 119.88) | 278.50 (276.09 – 280.91) | 370.64 (367.28 – 374.00) | 308.96 (303.72 – 314.21) |
| 2002 | 0.42 (0.36 – 0.48) | 6.03 (5.81 – 6.26) | 30.35 (29.81 – 30.89) | 114.84 (113.55 – 116.12) | 273.20 (270.81 – 275.59) | 376.53 (373.16 – 379.89) | 312.26 (307.02 – 317.50) |
| 2003 | 0.39 (0.33 – 0.45) | 5.61 (5.38 – 5.83) | 30.29 (29.76 – 30.82) | 110.44 (109.21 – 111.67) | 266.81 (264.46 – 269.17) | 376.78 (373.43 – 380.13) | 315.26 (310.05 – 320.47) |
| 2004 | 0.37 (0.31 – 0.43) | 5.53 (5.31 – 5.75) | 29.88 (29.36 – 30.41) | 106.03 (104.85 – 107.20) | 262.54 (260.21 – 264.86) | 372.91 (369.59 – 376.23) | 317.67 (312.49 – 322.85) |
| 2005 | 0.34 (0.28 – 0.39) | 5.33 (5.12 – 5.55) | 29.67 (29.15 – 30.19) | 102.31 (101.18 – 103.44) | 256.17 (253.89 – 258.46) | 374.87 (371.55 – 378.18) | 328.17 (322.99 – 333.35) |
| 2006 | 0.39 (0.33 – 0.46) | 4.68 (4.47 – 4.88) | 29.11 (28.60 – 29.62) | 98.04 (96.95 – 99.12) | 249.23 (247.00 – 251.46) | 372.03 (368.73 – 375.33) | 326.93 (321.85 – 332.01) |
| 2007 | 0.34 (0.28 – 0.40) | 4.32 (4.12 – 4.52) | 28.37 (27.87 – 28.86) | 94.18 (93.14 – 95.23) | 244.36 (242.17 – 246.54) | 369.39 (366.10 – 372.69) | 327.89 (322.89 – 332.89) |
| 2008 | 0.36 (0.30 – 0.42) | 3.80 (3.61 – 3.99) | 28.16 (27.67 – 28.66) | 90.12 (89.11 – 91.12) | 235.46 (233.36 – 237.56) | 366.52 (363.24 – 369.81) | 332.82 (327.86 – 337.78) |
| 2009 | 0.36 (0.30 – 0.41) | 3.65 (3.47 – 3.83) | 27.82 (27.33 – 28.31) | 87.42 (86.44 – 88.39) | 228.50 (226.47 – 230.54) | 359.66 (356.40 – 362.92) | 327.84 (322.99 – 332.68) |
| 2010 | 0.39 (0.33 – 0.45) | 3.29 (3.11 – 3.46) | 26.84 (26.37 – 27.32) | 85.34 (84.39 – 86.29) | 223.75 (221.76 – 225.74) | 357.14 (353.90 – 360.38) | 332.25 (327.43 – 337.07) |
| 2011 | 0.29 (0.24 – 0.34) | 3.10 (2.93 – 3.27) | 25.68 (25.21 – 26.15) | 83.44 (82.52 – 84.35) | 214.21 (212.30 – 216.12) | 345.88 (342.71 – 349.06) | 323.61 (318.95 – 328.26) |
| 2012 | 0.41 (0.35 – 0.47) | 2.89 (2.73 – 3.06) | 25.08 (24.61 – 25.55) | 81.49 (80.59 – 82.39) | 205.97 (204.15 – 207.78) | 339.44 (336.31 – 342.58) | 323.47 (318.88 – 328.07) |
| 2013 | 0.29 (0.24 – 0.34) | 2.83 (2.67 – 2.99) | 23.84 (23.38 – 24.29) | 79.91 (79.02 – 80.79) | 196.54 (194.81 – 198.27) | 328.36 (325.30 – 331.42) | 319.78 (315.27 – 324.29) |
| 2014 | 0.30 (0.25 – 0.35) | 2.73 (2.57 – 2.89) | 22.38 (21.94 – 22.83) | 78.41 (77.54 – 79.28) | 189.31 (187.65 – 190.97) | 321.04 (318.04 – 324.04) | 311.61 (307.20 – 316.02) |
| 2015 | 0.30 (0.25 – 0.35) | 2.50 (2.34 – 2.65) | 20.44 (20.02 – 20.87) | 76.79 (75.95 – 77.64) | 180.85 (179.26 – 182.43) | 306.16 (303.25 – 309.07) | 315.99 (311.60 – 320.39) |
| 2016 | 0.28 (0.23 – 0.33) | 2.18 (2.04 – 2.33) | 18.53 (18.12 – 18.94) | 73.19 (72.37 – 74.01) | 167.85 (166.35 – 169.35) | 295.30 (292.48 – 298.13) | 305.03 (300.75 – 309.32) |
| 2017 | 0.24 (0.20 – 0.29) | 2.06 (1.92 – 2.20) | 16.48 (16.09 – 16.86) | 70.21 (69.41 – 71.02) | 160.45 (159.01 – 161.89) | 283.41 (280.69 – 286.13) | 295.11 (290.93 – 299.30) |
| 2018 | 0.26 (0.21 – 0.31) | 1.89 (1.76 – 2.03) | 15.04 (14.67 – 15.42) | 68.48 (67.70 – 69.27) | 150.84 (149.47 – 152.22) | 267.79 (265.21 – 270.38) | 286.06 (281.96 – 290.15) |
| 2019 | 0.23 (0.18 – 0.27) | 1.85 (1.72 – 1.98) | 13.63 (13.28 – 13.99) | 64.76 (64.00 – 65.53) | 144.26 (142.94 – 145.59) | 260.78 (258.28 – 263.29) | 281.11 (277.06 – 285.15) |
| 2020 | 0.27 (0.22 – 0.32) | 1.79 (1.66 – 1.92) | 12.51 (12.17 – 12.86) | 62.83 (62.08 – 63.59) | 139.94 (138.66 – 141.23) | 246.10 (243.71 – 248.50) | 262.10 (258.22 – 265.99) |
| 2021 | 0.26 (0.21 – 0.30) | 1.78 (1.66 – 1.91) | 11.91 (11.58 – 12.25) | 60.47 (59.74 – 61.21) | 134.45 (133.21 – 135.69) | 248.76 (246.33 – 251.19) | 289.25 (284.94 – 293.56) |
| 2022 | 0.25 (0.21 – 0.30) | 1.76 (1.64 – 1.88) | 11.08 (10.76 – 11.41) | 57.92 (57.19 – 58.65) | 131.86 (130.63 – 133.08) | 232.48 (230.22 – 234.73) | 259.81 (255.89 – 263.73) |
| 2023 | 0.27 (0.23 – 0.32) | 1.66 (1.54 – 1.78) | 10.55 (10.24 – 10.87) | 55.52 (54.81 – 56.24) | 128.58 (127.38 – 129.77) | 225.96 (223.78 – 228.13) | 275.79 (271.65 – 279.92) |
| 2024 | 0.23 (0.19 – 0.28) | 1.57 (1.46 – 1.69) | 9.93 (9.62 – 10.23) | 50.89 (50.20 – 51.57) | 123.77 (122.61 – 124.93) | 215.56 (213.49 – 217.63) | 265.51 (261.53 – 269.49) |

**Supplementary Table2** Bronchus and Lung Cancer-related Mortality per 1,000,000 Adults in the United States stratified by sex, 1999 to 2024

| **Year** | **Age-Adjusted Mortality Rate (95% CI)** | |
| --- | --- | --- |
|  | Female | Male |
| 1999 | 62.18 (61.70 – 62.67) | 118.78 (117.99 – 119.57) |
| 2000 | 63.86 (63.37 – 64.35) | 118.59 (117.81 – 119.38) |
| 2001 | 63.51 (63.02 – 64.00) | 116.27 (115.50 – 117.04) |
| 2002 | 64.30 (63.81 – 64.78) | 113.52 (112.77 – 114.27) |
| 2003 | 63.83 (63.34 – 64.31) | 110.99 (110.25 – 111.73) |
| 2004 | 63.27 (62.79 – 63.75) | 108.42 (107.70 – 109.14) |
| 2005 | 62.79 (62.32 – 63.26) | 106.86 (106.15 – 107.56) |
| 2006 | 62.05 (61.58 – 62.51) | 103.61 (102.92 – 104.30) |
| 2007 | 61.92 (61.46 – 62.38) | 100.38 (99.71 – 101.05) |
| 2008 | 60.42 (59.97 – 60.87) | 98.17 (97.51 – 98.83) |
| 2009 | 59.66 (59.21 – 60.10) | 94.88 (94.24 – 95.52) |
| 2010 | 58.91 (58.47 – 59.34) | 93.17 (92.54 – 93.80) |
| 2011 | 57.27 (56.84 – 57.70) | 89.23 (88.63 – 89.84) |
| 2012 | 56.25 (55.84 – 56.67) | 86.67 (86.08 – 87.26) |
| 2013 | 54.83 (54.42 – 55.24) | 83.07 (82.50 – 83.63) |
| 2014 | 53.65 (53.25 – 54.05) | 79.86 (79.32 – 80.41) |
| 2015 | 51.75 (51.36 – 52.14) | 76.54 (76.01 – 77.07) |
| 2016 | 49.23 (48.85 – 49.60) | 72.19 (71.68 – 72.70) |
| 2017 | 47.33 (46.97 – 47.70) | 68.55 (68.06 – 69.04) |
| 2018 | 45.31 (44.95 – 45.66) | 64.54 (64.08 – 65.01) |
| 2019 | 43.55 (43.21 – 43.89) | 61.94 (61.49 – 62.39) |
| 2020 | 41.64 (41.31 – 41.97) | 58.84 (58.41 – 59.28) |
| 2021 | 42.14 (41.81 – 42.48) | 57.83 (57.40 – 58.27) |
| 2022 | 40.25 (39.93 – 40.57) | 54.46 (54.05 – 54.87) |
| 2023 | 39.92 (39.60 – 40.23) | 52.68 (52.28 – 53.09) |
| 2024 | 38.08 (37.78 – 38.39) | 49.92 (49.54 – 50.31) |

**Supplementary Table3**. Bronchus and Lung Cancer-related Mortality per 1,000,000 Adults in the United States stratified by race, 1999 to 2024

| **Year** | **Age-Adjusted Mortality Rate (95% CI)** | | | |
| --- | --- | --- | --- | --- |
|  | Hispanic or Latino | NH Black | NH White | NH Other |
| 1999 | 38.68 (37.35 – 40.01) | 101.50 (99.91 – 103.10) | 88.43 (87.95 – 88.92) | 45.79 (43.87 – 47.70) |
| 2000 | 38.23 (36.94 – 39.53) | 100.30 (98.72 – 101.87) | 89.99 (89.50 – 90.47) | 45.13 (43.28 – 46.98) |
| 2001 | 36.98 (35.75 – 38.20) | 97.94 (96.39 – 99.48) | 89.21 (88.73 – 89.69) | 46.68 (44.86 – 48.51) |
| 2002 | 37.45 (36.24 – 38.65) | 97.12 (95.60 – 98.64) | 88.72 (88.25 – 89.20) | 43.09 (41.39 – 44.79) |
| 2003 | 36.68 (35.52 – 37.85) | 95.55 (94.06 – 97.04) | 87.55 (87.08 – 88.02) | 44.83 (43.14 – 46.52) |
| 2004 | 35.80 (34.67 – 36.93) | 93.70 (92.23 – 95.17) | 86.36 (85.90 – 86.82) | 44.96 (43.32 – 46.59) |
| 2005 | 36.05 (34.96 – 37.15) | 91.76 (90.32 – 93.19) | 85.78 (85.32 – 86.24) | 43.92 (42.34 – 45.49) |
| 2006 | 33.41 (32.38 – 34.44) | 88.86 (87.47 – 90.26) | 84.27 (83.82 – 84.72) | 42.71 (41.20 – 44.23) |
| 2007 | 33.82 (32.80 – 34.83) | 86.96 (85.59 – 88.32) | 82.93 (82.48 – 83.38) | 43.48 (41.98 – 44.97) |
| 2008 | 33.46 (32.48 – 34.44) | 83.57 (82.24 – 84.89) | 81.31 (80.87 – 81.75) | 43.02 (41.57 – 44.47) |
| 2009 | 31.59 (30.66 – 32.52) | 81.22 (79.93 – 82.51) | 79.79 (79.36 – 80.22) | 41.63 (40.23 – 43.02) |
| 2010 | 31.55 (30.63 – 32.46) | 81.35 (80.07 – 82.63) | 78.45 (78.02 – 78.87) | 41.82 (40.45 – 43.18) |
| 2011 | 30.52 (29.65 – 31.39) | 78.00 (76.77 – 79.23) | 76.09 (75.68 – 76.51) | 41.13 (39.82 – 42.45) |
| 2012 | 29.66 (28.83 – 30.50) | 76.61 (75.41 – 77.82) | 74.22 (73.81 – 74.62) | 40.25 (39.00 – 41.51) |
| 2013 | 28.92 (28.12 – 29.72) | 74.45 (73.28 – 75.61) | 71.94 (71.54 – 72.33) | 38.70 (37.50 – 39.90) |
| 2014 | 28.23 (27.46 – 29.00) | 70.67 (69.55 – 71.79) | 70.23 (69.84 – 70.62) | 37.79 (36.65 – 38.93) |
| 2015 | 27.40 (26.67 – 28.14) | 66.61 (65.54 – 67.67) | 67.74 (67.36 – 68.12) | 36.91 (35.83 – 38.00) |
| 2016 | 25.73 (25.03 – 26.43) | 63.64 (62.62 – 64.67) | 64.23 (63.87 – 64.60) | 35.50 (34.46 – 36.55) |
| 2017 | 24.05 (23.39 – 24.71) | 60.02 (59.04 – 61.00) | 61.74 (61.38 – 62.09) | 33.55 (32.56 – 34.53) |
| 2018 | 23.32 (22.68 – 23.95) | 57.06 (56.12 – 58.00) | 58.75 (58.41 – 59.10) | 31.57 (30.63 – 32.50) |
| 2019 | 22.93 (22.31 – 23.54) | 55.13 (54.22 – 56.04) | 56.43 (56.10 – 56.76) | 31.19 (30.28 – 32.09) |
| 2020 | 21.74 (21.16 – 22.33) | 51.61 (50.74 – 52.48) | 54.04 (53.71 – 54.36) | 30.13 (29.26 – 31.00) |
| 2021 | 21.90 (21.32 – 22.50) | 51.64 (50.77 – 52.53) | 54.20 (53.88 – 54.53) | 29.14 (28.34 – 29.96) |
| 2022 | 21.04 (20.49 – 21.61) | 49.86 (49.01 – 50.72) | 51.30 (50.99 – 51.62) | 28.08 (27.32 – 28.85) |
| 2023 | 20.21 (19.67 – 20.75) | 47.87 (47.06 – 48.70) | 50.66 (50.35 – 50.97) | 27.68 (26.95 – 28.44) |
| 2024 | 20.04 (19.53 – 20.57) | 46.46 (45.67 – 47.26) | 48.21 (47.91 – 48.51) | 25.87 (25.19 – 26.58) |

**Supplementary Table** 4 Bronchus and Lung Cancer-related Mortality in the United States stratified by urban-rural, 1999 to 2020

| **Year** | **Age-Adjusted Mortality Rate (95% CI)** | |
| --- | --- | --- |
|  | Metropolitan | Nonmetropolitan |
| 1999 | 84.95 (84.47 – 85.42) | 89.16 (88.13 – 90.18) |
| 2000 | 85.40 (84.93 – 85.88) | 92.54 (91.50 – 93.58) |
| 2001 | 84.22 (83.76 – 84.69) | 91.73 (90.70 – 92.75) |
| 2002 | 83.43 (82.97 – 83.89) | 91.92 (90.90 – 92.94) |
| 2003 | 82.14 (81.69 – 82.60) | 90.68 (89.67 – 91.68) |
| 2004 | 80.64 (80.19 – 81.09) | 90.07 (89.07 – 91.06) |
| 2005 | 79.63 (79.19 – 80.07) | 89.89 (88.90 – 90.88) |
| 2006 | 77.76 (77.33 – 78.19) | 88.33 (87.36 – 89.31) |
| 2007 | 75.93 (75.51 – 76.36) | 88.80 (87.83 – 89.77) |
| 2008 | 74.28 (73.87 – 74.70) | 87.00 (86.05 – 87.95) |
| 2009 | 72.45 (72.05 – 72.85) | 85.53 (84.59 – 86.47) |
| 2010 | 71.34 (70.94 – 71.74) | 84.47 (83.54 – 85.40) |
| 2011 | 68.57 (68.18 – 68.95) | 83.31 (82.39 – 84.22) |
| 2012 | 66.91 (66.54 – 67.29) | 81.31 (80.42 – 82.21) |
| 2013 | 64.60 (64.24 – 64.96) | 79.10 (78.23 – 79.98) |
| 2014 | 62.53 (62.18 – 62.89) | 77.83 (76.97 – 78.70) |
| 2015 | 60.04 (59.70 – 60.38) | 75.60 (74.75 – 76.45) |
| 2016 | 56.61 (56.28 – 56.94) | 72.90 (72.07 – 73.72) |
| 2017 | 54.08 (53.77 – 54.40) | 69.65 (68.84 – 70.45) |
| 2018 | 51.31 (51.00 – 51.61) | 66.37 (65.60 – 67.15) |
| 2019 | 49.15 (48.86 – 49.44) | 64.70 (63.94 – 65.46) |
| 2020 | 46.68 (46.40 – 46.97) | 62.74 (62.00 – 63.49) |
